# Supplementary material
Source: PubMed Central journal article supplement (PMC2721000)
Supplement: supp_212_2_238__1.pdf [file supp_212_2_238__1.pdf]

Table S1. Wheel-running activity for day 1 in control and high runner (HR) lines of house mice (nested ANCOVAs)

|                                  | <i>N</i> | Control | HR<br>normal | HR mini | HRnormal/C | HRmini/C | HRmini/<br>HR<br>normal | Line type                     | Mini muscle                     | Age                            |
|----------------------------------|----------|---------|--------------|---------|------------|----------|-------------------------|-------------------------------|---------------------------------|--------------------------------|
| Total revolutions/day<br>(Day 1) | 176      | 3.06    | 5.77         | 7.77    | 1.89       | 2.54     | 1.35                    | $F_{1,6}=10.61$<br>$P=0.0173$ | $F_{1,166}=8.72$<br>$P=0.0036$  | $F_{1,166}=0.87$<br>$P=0.3521$ |
| 1-min intervals/day<br>(Day 1)   | 176      | 459     | 525          | 523     | 1.14       | 1.14     | 0.99                    | $F_{1,6}=3.21$<br>$P=0.1232$  | $F_{1,166}=0.00$<br>$P=0.9591$  | $F_{1,166}=0.71$<br>$P=0.3993$ |
| Average r.p.m.<br>(Day 1)        | 176      | 6.45    | 10.95        | 14.18   | 1.70       | 2.19     | 1.29                    | $F_{1,6}=18.94$<br>$P=0.0048$ | $F_{1,166}=10.09$<br>$P=0.0018$ | $F_{1,166}=5.80$<br>$P=0.0171$ |
| Maximal r.p.m.<br>(Day 1)        | 176      | 17.85   | 26.43        | 29.41   | 1.48       | 1.65     | 1.11                    | $F_{1,6}=13.80$<br>$P=0.0099$ | $F_{1,166}=1.60$<br>$P=0.2081$  | $F_{1,166}=2.26$<br>$P=0.1346$ |

Table S2. Wheel-running activity for day 2 in control (C) and high runner (HR) lines of house mice (nested ANCOVAs)

|                                  | <i>N</i> | Control | HR<br>normal | HR mini | HRnormal/C | HRmini/C | HRmini/<br>HR<br>normal | Line type                     | Mini<br>muscle                 | Age                            |
|----------------------------------|----------|---------|--------------|---------|------------|----------|-------------------------|-------------------------------|--------------------------------|--------------------------------|
| Total revolutions/day<br>(Day 2) | 194      | 3.07    | 8.12         | 8.60    | 2.64       | 2.80     | 1.06                    | $F_{1,6}=91.04$<br>$P<0.0001$ | $F_{1,184}=0.93$<br>$P=0.3365$ | $F_{1,184}=0.43$<br>$P=0.5119$ |
| 1-min intervals/day<br>(Day 2)   | 194      | 366     | 471          | 458     | 1.29       | 1.25     | 0.97                    | $F_{1,6}=7.93$<br>$P=0.0305$  | $F_{1,184}=0.20$<br>$P=0.6533$ | $F_{1,184}=2.71$<br>$P=0.1014$ |
| Average r.p.m.<br>(Day 2)        | 194      | 7.71    | 16.65        | 18.55   | 2.16       | 2.41     | 1.11                    | $F_{1,6}=65.73$<br>$P=0.0002$ | $F_{1,184}=2.79$<br>$P=0.0969$ | $F_{1,184}=3.75$<br>$P=0.0545$ |
| Maximal r.p.m.<br>(Day 2)        | 194      | 17.55   | 29.82        | 32.70   | 1.70       | 1.86     | 1.10                    | $F_{1,6}=63.21$<br>$P=0.0002$ | $F_{1,184}=3.29$<br>$P=0.0714$ | $F_{1,184}=6.42$<br>$P=0.0121$ |

Table S3. Wheel-running activity for day 3 in control (C) and high runner (HR) lines of house mice (nested ANCOVAs)

|                                  | <i>N</i> | Control | HR<br>normal | HR mini | HRnormal/C | HRmini/C | HRmini/<br>HR<br>normal | Line type                     | Mini<br>muscle                 | Age                            |
|----------------------------------|----------|---------|--------------|---------|------------|----------|-------------------------|-------------------------------|--------------------------------|--------------------------------|
| Total revolutions/day<br>(Day 3) | 195      | 3.43    | 8.90         | 9.79    | 2.60       | 2.86     | 1.10                    | $F_{1,6}=72.09$<br>$P<0.0001$ | $F_{1,185}=1.38$<br>$P=0.2418$ | $F_{1,185}=0.99$<br>$P=0.3221$ |
| 1-min intervals/day<br>(Day 3)   | 195      | 405     | 494          | 475     | 1.22       | 1.17     | 0.96                    | $F_{1,6}=6.30$<br>$P=0.0459$  | $F_{1,185}=0.36$<br>$P=0.5471$ | $F_{1,185}=1.01$<br>$P=0.3157$ |
| Average r.p.m.<br>(Day 3)        | 195      | 8.38    | 18.20        | 21.03   | 2.17       | 2.51     | 1.16                    | $F_{1,6}=71.44$<br>$P=0.0001$ | $F_{1,185}=4.83$<br>$P=0.0293$ | $F_{1,185}=4.83$<br>$P=0.0377$ |
| Maximal r.p.m.<br>(Day 3)        | 195      | 18.89   | 31.62        | 36.09   | 1.67       | 1.91     | 1.14                    | $F_{1,6}=55.53$<br>$P=0.0003$ | $F_{1,185}=6.29$<br>$P=0.0130$ | $F_{1,185}=5.75$<br>$P=0.0175$ |

Table S4. Wheel-running activity for day 4 in control (C) and high runner (HR) lines of house mice (nested ANCOVAs)

|                                  | <i>N</i> | Control | HR<br>normal | HR mini | HRnormal/C | HRmini/C | HRmini/<br>HR<br>normal | Line type                     | Mini<br>muscle                 | Age                            |
|----------------------------------|----------|---------|--------------|---------|------------|----------|-------------------------|-------------------------------|--------------------------------|--------------------------------|
| Total revolutions/day<br>(Day 4) | 194      | 3.62    | 10.33        | 11.86   | 2.85       | 3.27     | 1.15                    | $F_{1,6}=6.48$<br>$P<0.0001$  | $F_{1,184}=3.29$<br>$P=0.0712$ | $F_{1,184}=0.06$<br>$P=0.8131$ |
| 1-min intervals/day<br>(Day 4)   | 193      | 410     | 505          | 488     | 1.23       | 1.19     | 0.97                    | $F_{1,6}=11.45$<br>$P=0.0148$ | $F_{1,183}=0.39$<br>$P=0.5350$ | $F_{1,183}=0.71$<br>$P=0.4022$ |
| Average r.p.m.<br>(Day 4)        | 194      | 8.94    | 20.14        | 24.37   | 2.25       | 2.73     | 1.21                    | $F_{1,6}=78.59$<br>$P=0.0001$ | $F_{1,184}=9.70$<br>$P=0.0021$ | $F_{1,184}=0.30$<br>$P=0.5817$ |
| Maximal r.p.m.<br>(Day 4)        | 194      | 19.40   | 33.65        | 38.37   | 1.73       | 1.98     | 1.14                    | $F_{1,6}=98.05$<br>$P<0.0001$ | $F_{1,184}=7.84$<br>$P=0.0057$ | $F_{1,184}=2.70$<br>$P=0.1019$ |

Data were transformed as necessary to improve normality of residuals. Values are back-transformed least-squares means from SAS Procedure Mixed (and ratios of them). Total revolutions/day=number of revolutions $\times 10^2$ ; 1 revolution=1.12 m; 1-min intervals/day is the number of 1-min intervals during which any wheel revolutions occurred.

Table S5. Wheel-running activity for days 5 to 6 in control (C) and high runner (HR) lines of house mice (nested ANCOVAs)

|                                                 | Transform          | N   | Control | HR normal | HR mini | HR normal/C | HR mini/C | HR mini/HR normal | Line type                                                       | Mini muscle                                                     | Estrous cycle                 | Age                                                          | Time                                                        |
|-------------------------------------------------|--------------------|-----|---------|-----------|---------|-------------|-----------|-------------------|-----------------------------------------------------------------|-----------------------------------------------------------------|-------------------------------|--------------------------------------------------------------|-------------------------------------------------------------|
| Total revolutions/day (Day 5)                   | ^0.6               | 195 | 3.64    | 11.40     | 14.56   | 3.13        | 3.99      | 1.28              | <b><math>F_{1,6}=70.88</math><br/><math>P=0.0002</math></b>     | <b><math>F_{1,185}=8.39</math><br/><math>P=0.0042</math></b>    |                               | $F_{1,185}=0.34$<br>$P=0.5619$                               |                                                             |
| Total revolutions/day (partial Day 6 – Group 2) | ^1.5               | 66  | 3.05    | 11.20     | 15.04   | 3.67        | 4.93      | 1.34              | <b><math>F_{1,6}=14.27</math><br/><math>P=0.0092</math></b>     | <b><math>F_{1,51}=9.94</math><br/><math>P=0.0027</math></b>     | $F_{4,51}=1.90$<br>$P=0.1242$ | <b><math>F_{1,51}=4.08</math><br/><math>P=0.0487</math></b>  | $F_{1,51}=0.30$<br>$P=0.5855$                               |
| Total revolutions/day (partial Day 6 – Group 3) | none               | 63  | 3.52    | 12.49     | 14.24   | 3.55        | 4.04      | 1.14              | <b><math>F_{1,6}=43.85</math><br/><math>P=0.0006</math></b>     | $F_{1,48}=1.24$<br>$P=0.2713$                                   | $F_{4,48}=1.16$<br>$P=0.3389$ | <b><math>F_{1,48}=8.87</math><br/><math>P=0.0045</math></b>  | $F_{1,48}=2.39$<br>$P=0.1288$                               |
| 1-min intervals/day (Day 5)                     | none               | 195 | 386     | 529       | 565     | 1.37        | 1.46      | 1.07              | <b><math>F_{1,6}=11.50</math><br/><math>P=0.0147</math></b>     | $F_{1,185}=1.22$<br>$P=0.2716$                                  |                               | $F_{1,185}=1.62$<br>$P=0.2050$                               |                                                             |
| 1-min intervals/day (partial Day 6 – Group 2)   | ^1.5               | 66  | 273     | 441       | 397     | 1.62        | 1.45      | 0.90              | <b><math>F_{1,6}=18.41</math><br/><math>P=0.0051</math></b>     | $F_{1,51}=1.70$<br>$P=0.1986$                                   | $F_{4,51}=1.70$<br>$P=0.1650$ | <b><math>F_{1,51}=4.12</math><br/><math>P=0.0477</math></b>  | $F_{1,51}=2.51$<br>$P=0.1195$                               |
| 1-min intervals/day (partial Day 6 – Group 3)   | ^2.3               | 63  | 359     | 522       | 526     | 1.45        | 1.47      | 1.01              | <b><math>F_{1,6}=20.40</math><br/><math>P=0.0040</math></b>     | $F_{1,48}=0.02$<br>$P=0.8908$                                   | $F_{4,48}=0.26$<br>$P=0.9015$ | <b><math>F_{1,48}=10.39</math><br/><math>P=0.0023</math></b> | $F_{1,48}=0.07$<br>$P=0.7930$                               |
| Average r.p.m. (Day 5)                          | ^0.8               | 195 | 9.39    | 21.28     | 26.20   | 2.27        | 2.79      | 1.23              | <b><math>F_{1,6}=72.03</math><br/><math>P=0.0001</math></b>     | <b><math>F_{1,185}=11.65</math><br/><math>P=0.0008</math></b>   |                               | $F_{1,185}=0.25$<br>$P=0.6195$                               |                                                             |
| Average r.p.m. (partial Day 6 – Group 2)        | ^10.0              | 66  | 10.53   | 25.05     | 35.74   | 2.38        | 3.39      | 1.43              | <b><math>F_{1,6}=8.51</math><br/><math>P=0.0267</math></b>      | <b><math>F_{1,51}=33.50</math><br/><math>P&lt;0.0001</math></b> | $F_{4,51}=0.73$<br>$P=0.5787$ | $F_{1,51}=2.23$<br>$P=0.1417$                                | $F_{1,51}=0.00$<br>$P=0.9457$                               |
| Average r.p.m. (partial Day 6 – Group 3)        | ^4.0               | 63  | 10.15   | 23.95     | 27.16   | 2.36        | 2.67      | 1.13              | <b><math>F_{1,6}=66.31</math><br/><math>P=0.0002</math></b>     | $F_{1,48}=2.53$<br>$P=0.1184$                                   | $F_{4,48}=1.79$<br>$P=0.1470$ | $F_{1,48}=5.63$<br>$P=0.0217$                                | <b><math>F_{1,48}=6.03</math><br/><math>P=0.0177</math></b> |
| Maximal r.p.m. (Day 5)                          | ^0.8               | 195 | 20.01   | 35.44     | 40.39   | 1.77        | 2.02      | 1.14              | <b><math>F_{1,6}=75.90</math><br/><math>P=0.0001</math></b>     | <b><math>F_{1,185}=7.84</math><br/><math>P=0.0057</math></b>    |                               | $F_{1,185}=2.15$<br>$P=0.1439$                               |                                                             |
| Maximal r.p.m. (partial Day 6 – Group 2)        | ^3.5               | 66  | 24.69   | 40.31     | 49.1    | 1.63        | 2.00      | 1.23              | <b><math>F_{1,6}=13.35</math><br/><math>P=0.0107</math></b>     | <b><math>F_{1,51}=22.87</math><br/><math>P&lt;0.0001</math></b> | $F_{4,51}=1.12$<br>$P=0.3559$ | $F_{1,51}=1.16$<br>$P=0.2868$                                | $F_{1,51}=0.48$<br>$P=0.4924$                               |
| Maximal r.p.m. (partial Day 6 – Group 3)        | ^log <sub>10</sub> | 63  | 20.93   | 38.01     | 40.66   | 1.82        | 1.94      | 1.07              | <b><math>F_{1,6}=103.37</math><br/><math>P&lt;0.0001</math></b> | $F_{1,48}=0.95$<br>$P=0.3343$                                   | $F_{4,48}=1.64$<br>$P=0.1787$ | <b><math>F_{1,48}=6.94</math><br/><math>P=0.0113</math></b>  | <b><math>F_{1,48}=7.03</math><br/><math>P=0.0108</math></b> |

Values are back-transformed least-squares means from SAS Procedure Mixed (and ratios of them). Total revolutions/day=number of revolutions $\times 10^3$ ; 1 revolution=1.12 m; 1-min intervals/day is the number of 1-min intervals during which any wheel revolutions occurred.

Values from day 5 include mice from groups 1, 2 and 3. Values from day 6 were separately analyzed for mice that ran only until 2:00 h (Group 2) and mice that ran until 7:00 h (Group 3).

Analyses for day 6 had time of capture included in the model as a covariate and estrous cycle included as a cofactor. Data were transformed as indicated to improve normality of residuals.
